# Supplementary material for: Quantitative Proteomics Reveals the Relationship between Protein Changes and Volatile Flavor Formation in Hunan Bacon during Low-Temperature Smoking
Source: MDPI journal article supplement (doi:10.3390/foods13091360), 2024-04-28
Supplement: s1 [file s1]

**Table S1.** Changes in volatile flavor compounds of bacon during LTS.

|           | Volatile compounds (µg/kg)           | CAS        | 0                       | 2                        | 4                       | 6                       | 8                       | 10                       |
|-----------|--------------------------------------|------------|-------------------------|--------------------------|-------------------------|-------------------------|-------------------------|--------------------------|
| Aldehydes | Furfural                             | 98-01-1    | 0.62±0.41 <sup>c</sup>  | 1.18±0.70 <sup>c</sup>   | 0.46±0.37 <sup>c</sup>  | 735±189 <sup>a</sup>    | 672±33.5 <sup>a</sup>   | 337±115 <sup>b</sup>     |
|           | Nonanal                              | 124-19-6   | 6.58±4.93 <sup>a</sup>  | 34.2±8.54 <sup>ab</sup>  | 58.9±5.55 <sup>b</sup>  | 137±41.5 <sup>a</sup>   | 111±12.5 <sup>a</sup>   | 133±24.9 <sup>a</sup>    |
|           | Decanal                              | 112-31-2   | 2.40±0.99 <sup>c</sup>  | 3.20±0.76 <sup>c</sup>   | 3.91±0.92 <sup>c</sup>  | 9.76±3.54 <sup>ab</sup> | 13.2±5.55 <sup>a</sup>  | 7.17±1.46 <sup>bc</sup>  |
|           | Tetradecanal                         | 124-25-4   | 0.69±0.43 <sup>b</sup>  | 2.02±0.68 <sup>b</sup>   | 2.83±0.24 <sup>b</sup>  | 6.71±0.79 <sup>a</sup>  | 8.17±1.38 <sup>a</sup>  | 8.24±2.44 <sup>a</sup>   |
|           | Pentadecanal                         | 2765-11-9  | 2.03±1.88 <sup>c</sup>  | 5.93±4.35 <sup>abc</sup> | 3.98±0.86 <sup>bc</sup> | 10.3±1.53 <sup>a</sup>  | 8.33±2.32 <sup>ab</sup> | 9.73±2.03 <sup>a</sup>   |
|           | Hexadecanal                          | 629-80-1   | 1.63±0.65 <sup>c</sup>  | 30.6±3.16 <sup>c</sup>   | 98.2±21.2 <sup>b</sup>  | 241±34.8 <sup>a</sup>   | 107±6.75 <sup>b</sup>   | 245±32.3 <sup>a</sup>    |
|           | Octadecanal                          | 638-66-4   | 0.48±0.11 <sup>e</sup>  | 2.75±0.50 <sup>d</sup>   | 5.61±1.13 <sup>c</sup>  | 14.1±2.05 <sup>a</sup>  | 8.33±0.70 <sup>b</sup>  | 14.7±5.56 <sup>a</sup>   |
|           | Dihydropyran-3-one                   | 23462-75-1 | 0.30±0.12 <sup>b</sup>  | 2.98±1.30 <sup>b</sup>   | 5.08±1.25 <sup>b</sup>  | 42.1±8.66 <sup>a</sup>  | 38.9±1.39 <sup>a</sup>  | 38.7±5.91 <sup>a</sup>   |
|           | 3-methylcyclopent-2-en-1-one         | 2758-18-1  | 0                       | 0.30±0.23 <sup>b</sup>   | 72.0±21.7 <sup>b</sup>  | 537±91.7 <sup>a</sup>   | 513±34.5 <sup>a</sup>   | 511±100 <sup>a</sup>     |
|           | 4-methyl-2H-furan-5-one              | 22122-36-7 | 0                       | 0                        | 0.01±0.02 <sup>b</sup>  | 193±27.6 <sup>a</sup>   | 181±11.9 <sup>a</sup>   | 200±29.4 <sup>a</sup>    |
| Ketones   | 3-methylcyclohex-3-en-1-one          | 31883-98-4 | 0                       | 7.58±0.14 <sup>b</sup>   | 17.6±0.41 <sup>b</sup>  | 116±17.5 <sup>a</sup>   | 99.5±7.98 <sup>a</sup>  | 94.9±21.1 <sup>a</sup>   |
|           | 2-Furanone, 2,5-dihydro-3,5-dimethyl |            | 0.02±0.03 <sup>b</sup>  | 18.9±2.70 <sup>b</sup>   | 48.1±3.75 <sup>b</sup>  | 353±48.6 <sup>a</sup>   | 342±24.6 <sup>a</sup>   | 338±64.2 <sup>a</sup>    |
|           | 3-Methyl-1,2-cyclopentanedione       | 765-70-8   | 38.6±1.26 <sup>b</sup>  | 62.3±3.70 <sup>b</sup>   | 63.6±4.27 <sup>b</sup>  | 1553±95.9 <sup>a</sup>  | 1569±289 <sup>a</sup>   | 1592±217 <sup>a</sup>    |
|           | 2,3-Dimethyl-2-cyclopentene-1-one    | 1121-05-7  | 0                       | 51.5±2.27 <sup>b</sup>   | 109±7.54 <sup>b</sup>   | 561±43.3 <sup>a</sup>   | 570±76.9 <sup>a</sup>   | 546±105 <sup>a</sup>     |
|           | 3-methylcyclopentane-1,2,4-trione    | 4505-54-8  | 0                       | 10.6±0.43 <sup>b</sup>   | 21.0±0.81 <sup>b</sup>  | 123±21.9 <sup>a</sup>   | 113±26.8 <sup>a</sup>   | 99.0±22.0 <sup>a</sup>   |
|           | 4,5-dimethylhex-4-en-3-one           | 17325-90-5 | 0                       | 7.48±1.68 <sup>b</sup>   | 19.9±2.08 <sup>b</sup>  | 136±31.4 <sup>a</sup>   | 132±28.2 <sup>a</sup>   | 128±18.58 <sup>a</sup>   |
|           | phenylacetone                        | 103-79-7   | 0.01±0.02 <sup>d</sup>  | 0.20±0.10 <sup>d</sup>   | 2.94±0.60 <sup>c</sup>  | 16.1±1.15 <sup>a</sup>  | 12.9±2.16 <sup>b</sup>  | 12.6±1.87 <sup>b</sup>   |
|           | 2-ethyl-3-methyl-2-cyclopenten-1-one | 5682-72-4  | 0                       | 5.72±0.46 <sup>b</sup>   | 12.3±0.96 <sup>b</sup>  | 79.7±11.1 <sup>a</sup>  | 71.7±11.9 <sup>a</sup>  | 66.6±9.67 <sup>a</sup>   |
|           | 2',4'-dihydroxyacetophenone          | 89-84-9    | 0                       | 0                        | 0.01±0.01 <sup>c</sup>  | 108±10.59 <sup>a</sup>  | 69.1±26.3 <sup>b</sup>  | 108±14.2 <sup>a</sup>    |
|           | 3,4-dimethyl-2H-furan-5-one          | 1575-46-8  | 0.29±0.16 <sup>c</sup>  | 0.42±0.26 <sup>c</sup>   | 13.2±0.47 <sup>c</sup>  | 145±16.4 <sup>a</sup>   | 121±17.8 <sup>b</sup>   | 136±15.7 <sup>ab</sup>   |
| Esters    | dihydro-3-methyl-2(3H)-Furanone      | 1679-47-6  | 0.26±0.13 <sup>b</sup>  | 0.33±0.31 <sup>b</sup>   | 6.03±1.83 <sup>b</sup>  | 26.3±4.95 <sup>a</sup>  | 28.8±4.74 <sup>a</sup>  | 22.6±3.53 <sup>a</sup>   |
|           | Methyl n-caprate                     | 110-42-9   | 0                       | 1.04±0.14 <sup>c</sup>   | 1.72±0.25 <sup>c</sup>  | 7.61±0.66 <sup>b</sup>  | 10.6±1.27 <sup>a</sup>  | 8.75±1.88 <sup>ab</sup>  |
|           | Methyl hexadecanoate                 | 112-39-0   | 0.47±0.34 <sup>b</sup>  | 0.73±0.31 <sup>b</sup>   | 1.36±0.36 <sup>b</sup>  | 6.88±4.43 <sup>a</sup>  | 3.75±1.31 <sup>ab</sup> | 7.48±1.38 <sup>a</sup>   |
|           | dibutyl benzene-1,4-dicarboxylate    | 1962-75-0  | 33.6±27.9 <sup>ab</sup> | 11.8±13.5 <sup>b</sup>   | 53.3±83.5 <sup>ab</sup> | 239±205 <sup>a</sup>    | 68.8±43.3 <sup>ab</sup> | 157±78.2 <sup>ab</sup>   |
|           | 2-methylbutyric acid                 | 116-53-0   | 0                       | 1.44±0.63 <sup>b</sup>   | 4.89±1.13 <sup>b</sup>  | 52.7±11.3 <sup>a</sup>  | 43.8±3.33 <sup>a</sup>  | 44.7±10.5 <sup>a</sup>   |
|           | valeric acid                         | 109-52-4   | 0.01±0.01 <sup>b</sup>  | 0.46±0.15 <sup>b</sup>   | 0.86±1.08 <sup>b</sup>  | 67.3±15.5 <sup>a</sup>  | 47.1±9.65 <sup>b</sup>  | 56.5±10.14 <sup>ab</sup> |
|           | Octanoic acid                        | 124-07-2   | 0                       | 0.02±0.02 <sup>c</sup>   | 2.20±1.80 <sup>c</sup>  | 50.2±5.01 <sup>ab</sup> | 41.0±11.9 <sup>b</sup>  | 53.1±5.01 <sup>a</sup>   |
|           | Decanoic acid                        | 334-48-5   | 0                       | 0                        | 0.01±0.02 <sup>b</sup>  | 14.0±3.99 <sup>a</sup>  | 15.2±5.32 <sup>a</sup>  | 13.1±2.11 <sup>a</sup>   |
|           | Palmitic acid                        | 57-10-3    | 2.70±0.06 <sup>b</sup>  | 9.40±6.30 <sup>b</sup>   | 9.49±6.57 <sup>b</sup>  | 44.0±32.6 <sup>a</sup>  | 22.5±1.45 <sup>ab</sup> | 17.1±5.68 <sup>ab</sup>  |
|           | 2-Acetyl-5-methylfuran               | 1193-79-9  | 0.11±0.05 <sup>b</sup>  | 5.02±0.79 <sup>b</sup>   | 35.9±5.15 <sup>b</sup>  | 254±16.1 <sup>a</sup>   | 242±34.1 <sup>a</sup>   | 244±35.8 <sup>a</sup>    |
| Furans    | Limonene                             | 138-86-3   | 0.84±0.05 <sup>c</sup>  | 3.48±0.86 <sup>b</sup>   | 1.17±0.21 <sup>c</sup>  | 7.53±0.56 <sup>a</sup>  | 8.15±1.14 <sup>a</sup>  | 3.84±1.34 <sup>b</sup>   |
|           | 5-methyldecane                       | 13151-35-4 | 1.55±0.28 <sup>b</sup>  | 1.80±0.22 <sup>b</sup>   | 4.64±0.12 <sup>b</sup>  | 23.1±3.00 <sup>a</sup>  | 26.8±6.95 <sup>a</sup>  | 21.9±4.68 <sup>a</sup>   |
|           | Dodecane                             | 112-40-3   | 4.73±1.68 <sup>b</sup>  | 5.38±1.35 <sup>b</sup>   | 5.20±0.82 <sup>b</sup>  | 12.8±2.72 <sup>a</sup>  | 12.1±2.81 <sup>a</sup>  | 5.68±1.64 <sup>b</sup>   |
|           | 2,6,11-Trimethyldodecane             | 31295-56-4 | 4.41±2.10 <sup>bc</sup> | 3.79±0.66 <sup>c</sup>   | 3.19±0.42 <sup>c</sup>  | 8.41±3.46 <sup>ab</sup> | 10.2±2.62 <sup>a</sup>  | 4.64±0.78 <sup>bc</sup>  |
| Alkanes   | Tetradecane                          | 629-59-4   | 2.97±0.50 <sup>c</sup>  | 4.22±1.12 <sup>c</sup>   | 4.38±0.74 <sup>c</sup>  | 24.3±5.59 <sup>b</sup>  | 33.6±6.42 <sup>a</sup>  | 24.8±2.56 <sup>b</sup>   |

|          |                           |           |                        |                         |                        |                         |                        |                         |
|----------|---------------------------|-----------|------------------------|-------------------------|------------------------|-------------------------|------------------------|-------------------------|
|          | Pentadecane               | 629-62-9  | 1.10±0.26 <sup>c</sup> | 2.84±0.13 <sup>c</sup>  | 3.55±0.49 <sup>c</sup> | 29.8±4.31 <sup>b</sup>  | 31.0±9.45 <sup>b</sup> | 40.2±3.45 <sup>a</sup>  |
|          | Hexadecane                | 544-76-3  | 3.18±1.48 <sup>c</sup> | 2.14±0.27 <sup>c</sup>  | 3.99±2.33 <sup>c</sup> | 14.5±3.70 <sup>b</sup>  | 16.3±3.33 <sup>b</sup> | 22.4±2.50 <sup>a</sup>  |
|          | Heptadecane               | 629-78-7  | 1.24±0.12 <sup>b</sup> | 1.64±0.13 <sup>b</sup>  | 1.73±0.14 <sup>b</sup> | 6.32±1.57 <sup>a</sup>  | 5.25±0.12 <sup>a</sup> | 5.66±0.89 <sup>a</sup>  |
|          | Eicosane                  | 112-95-8  | 0.56±0.52 <sup>c</sup> | 2.32±0.34 <sup>c</sup>  | 5.25±1.2 <sup>b</sup>  | 13.2±1.38 <sup>a</sup>  | 7.8±2.6 <sup>b</sup>   | 13.5±1.32 <sup>a</sup>  |
|          | 1,2,3-Trimethoxybenzene   | 634-36-6  | 0                      | 0.99±0.10 <sup>c</sup>  | 2.72±0.44 <sup>c</sup> | 31.8±6.75 <sup>a</sup>  | 22.8±3.11 <sup>b</sup> | 26.3±4.02 <sup>ab</sup> |
|          | 3-methylbut-2-enylbenzene | 4489-84-3 | 0.01±0.01 <sup>b</sup> | 0.62±0.82 <sup>b</sup>  | 2.82±0.36 <sup>b</sup> | 22.2±3.83 <sup>a</sup>  | 18.1±2.41 <sup>a</sup> | 19.1±2.71 <sup>a</sup>  |
| Nitrides | N,N-Dibutylformamide      | 761-65-9  | 0                      | 22.6±3.91 <sup>cd</sup> | 18.3±1.86 <sup>d</sup> | 33.1±5.48 <sup>bc</sup> | 37.1±6.01 <sup>b</sup> | 59.5±10.9 <sup>a</sup>  |

Results were expressed as mean ± standard derivation. <sup>a-e</sup> Means within rows and same breed with different superscripts differ significantly ( $P < 0.05$ , differences between fumigation time).
